# Supplementary material for: Targeting amino acids metabolic profile to identify novel metabolic characteristics in atrial fibrillation
Source: PubMed Central journal article supplement — Clin Sci (Lond). 2018 Oct 5;132(19):2135–46. doi: 10.1042/CS20180247 (PMC6365628; doi:10.1042/cs20180247), 2018-10-05
Supplement: cs-132-cs20180247_supp1.pdf [file cs-132-cs20180247_supp1.pdf]

# Supplementary Figure1 Data normalization

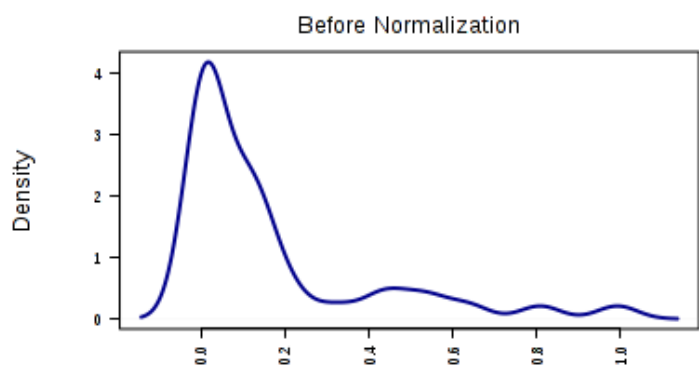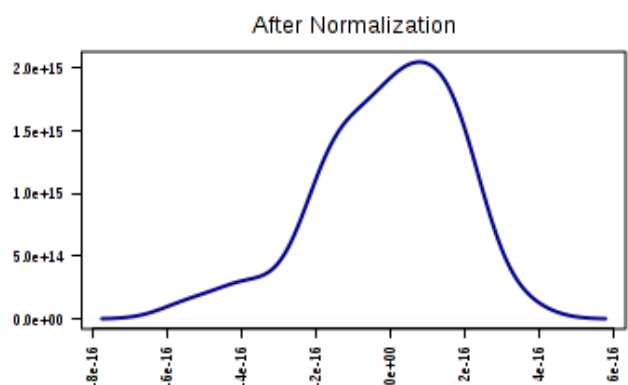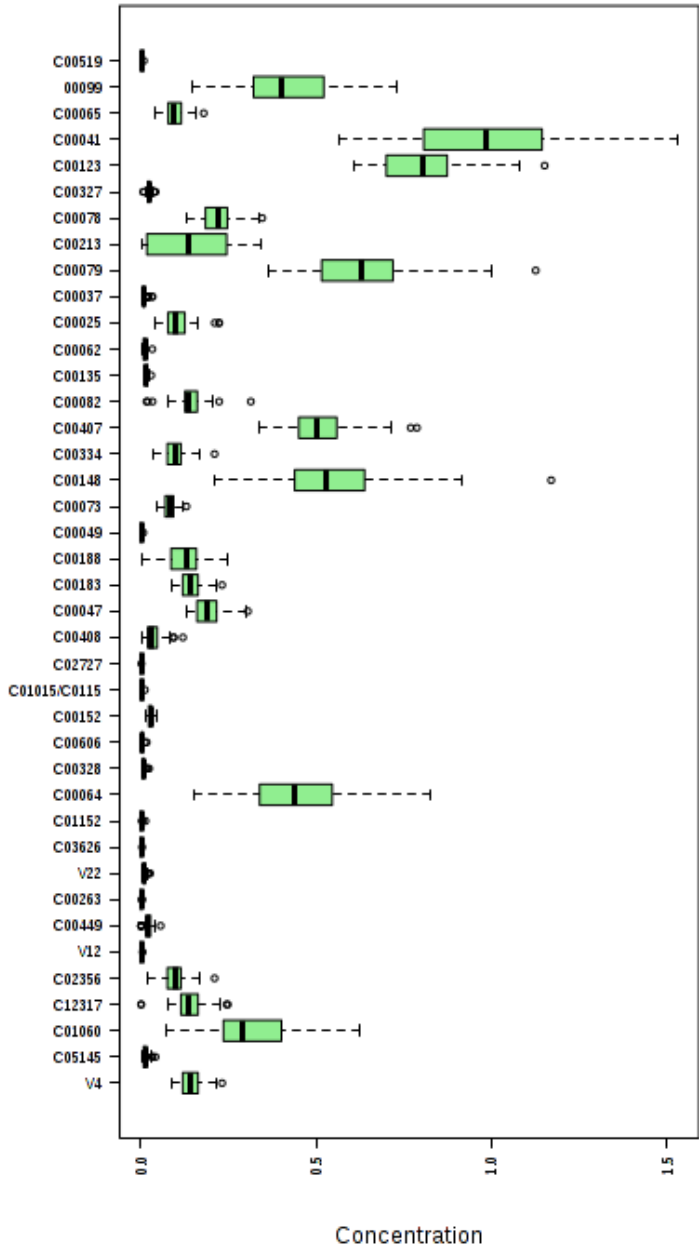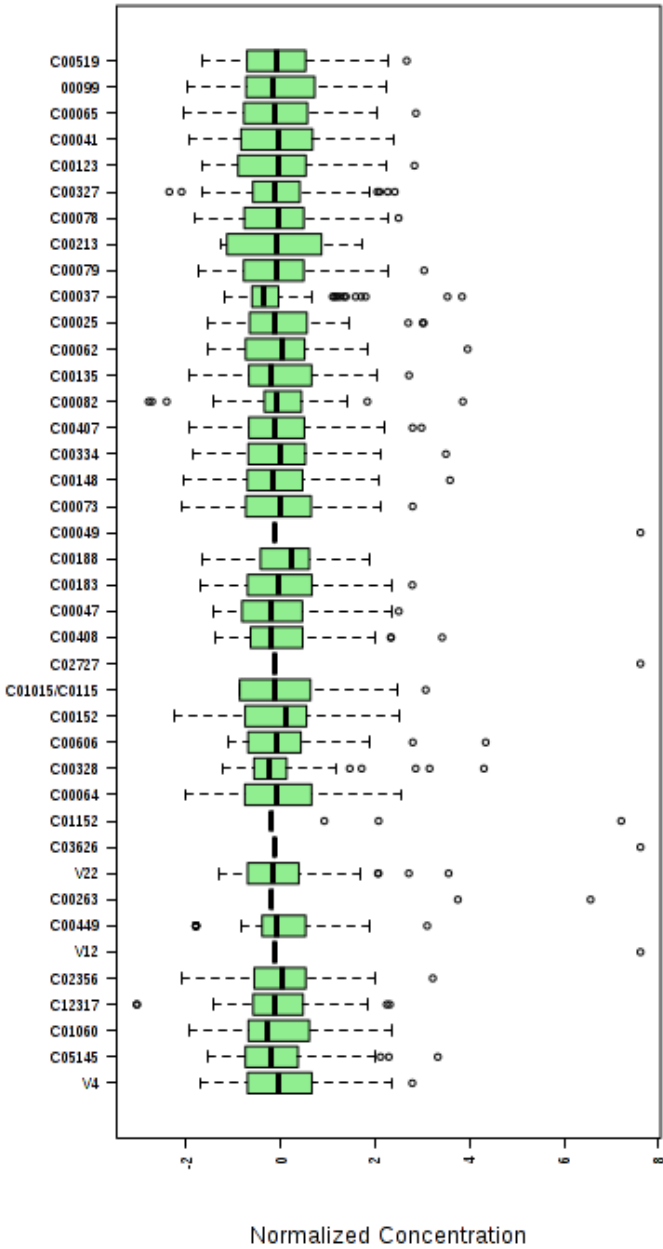

# Supplementary Figure2 Heatmap of the overall amino acid

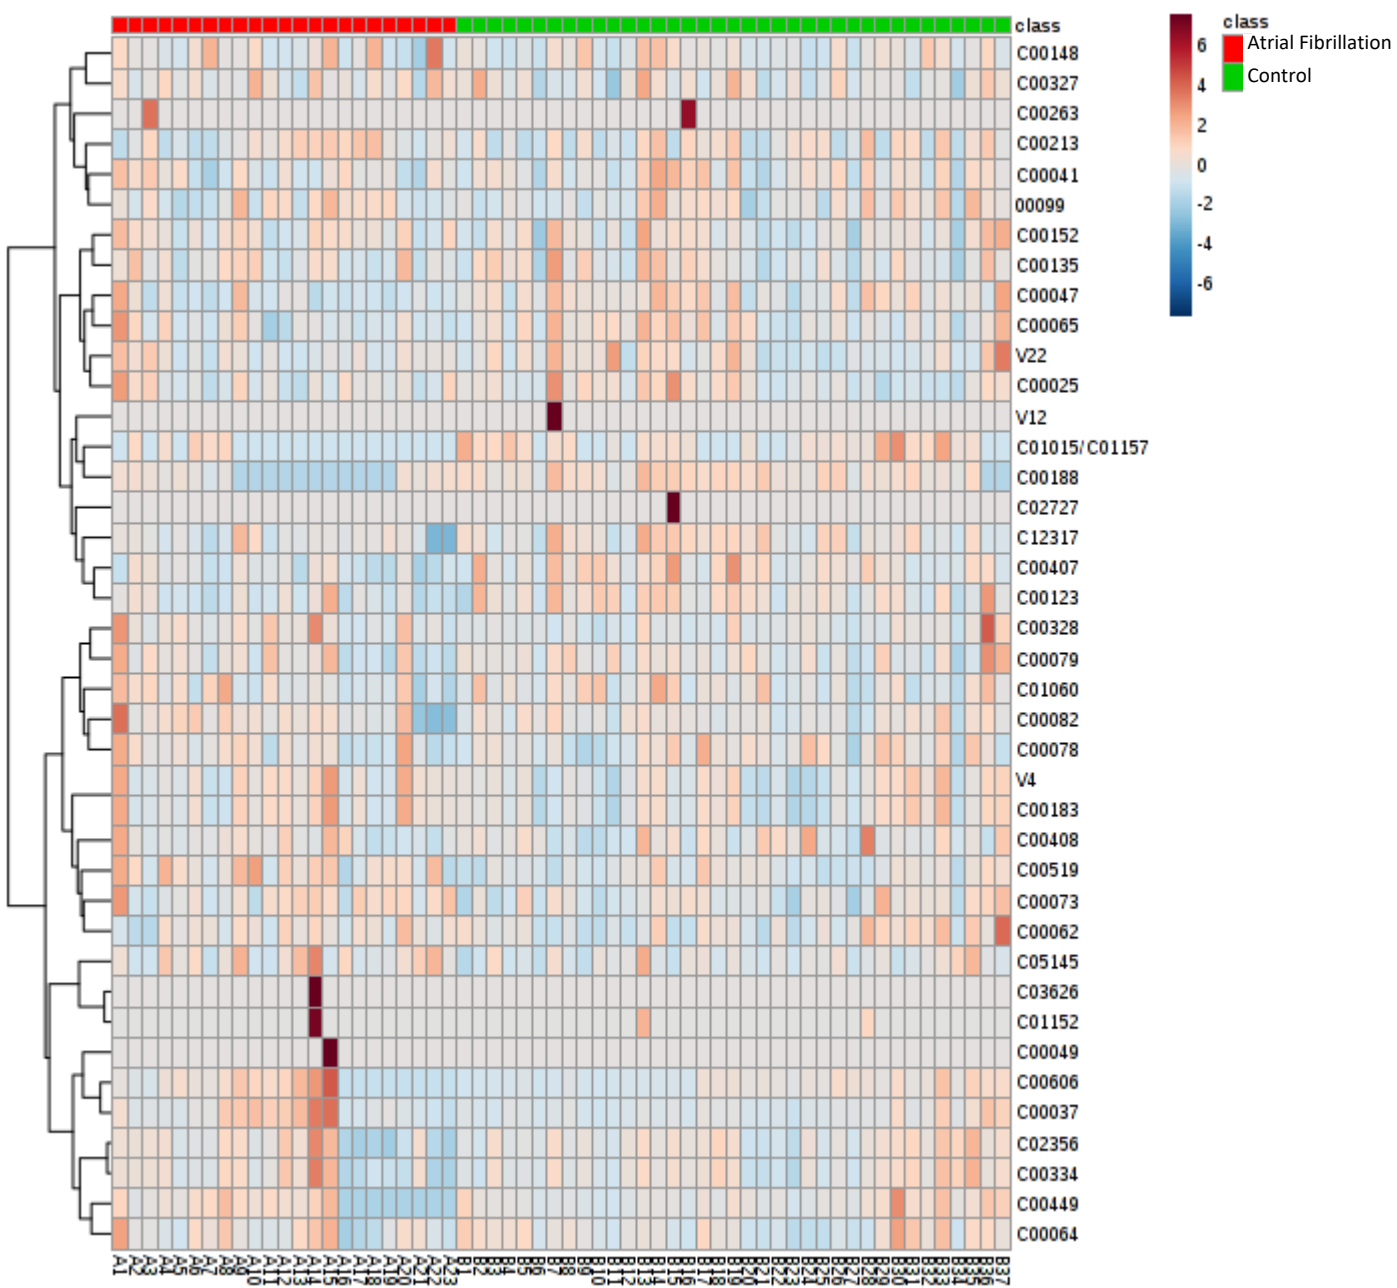

# Supplementary Figure3 Multivariate Exploratory ROC Analysis

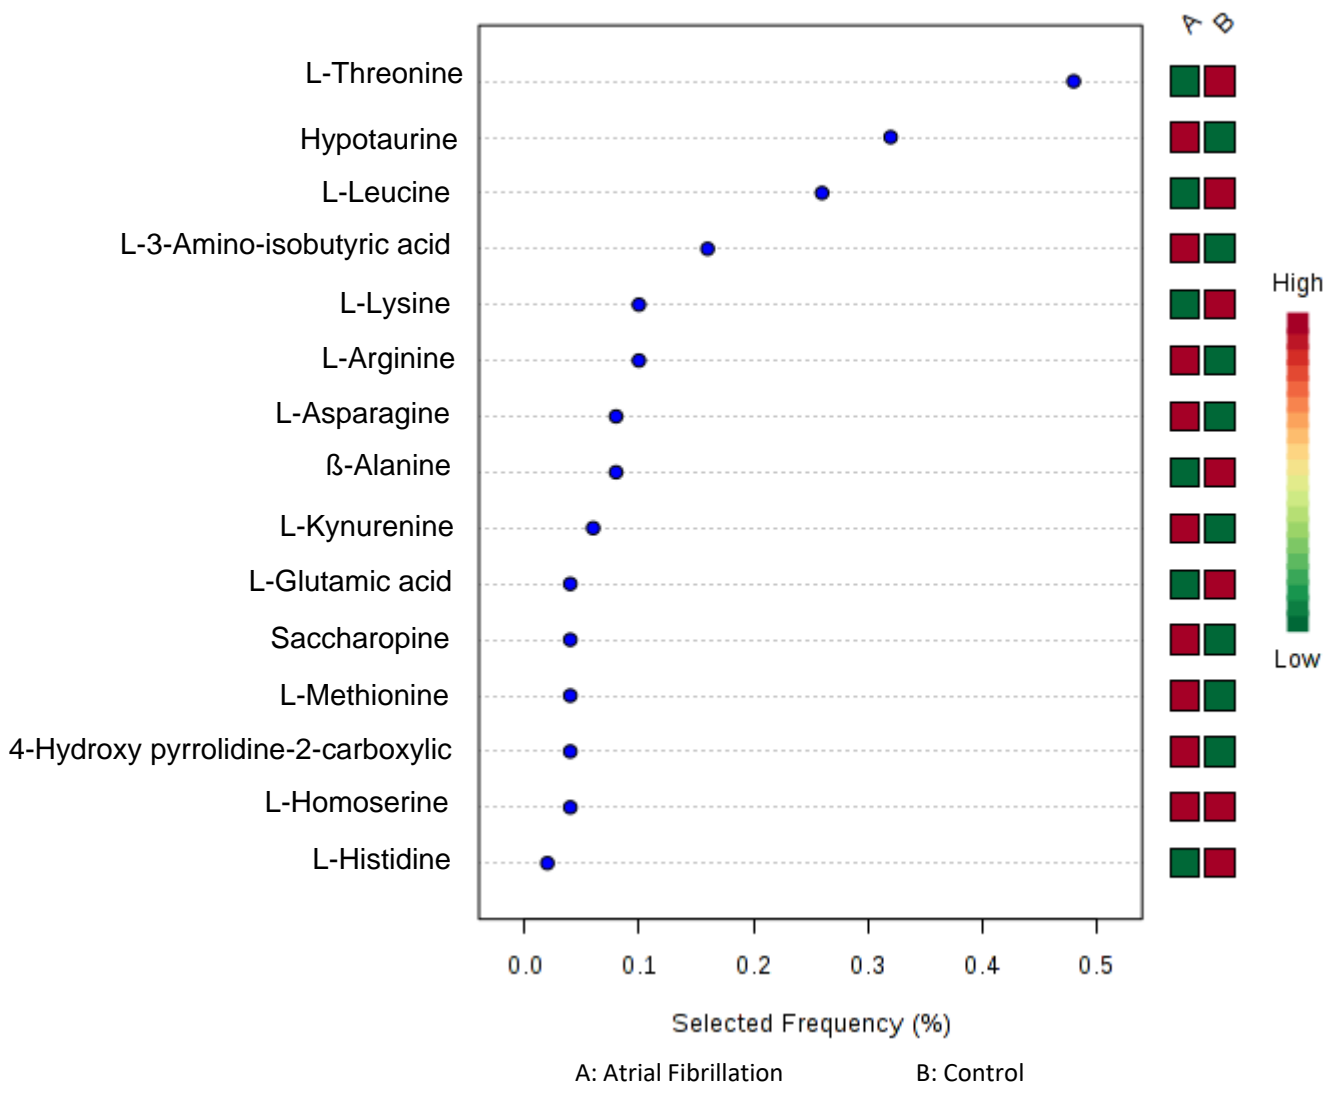

# Supplementary Figure 4 Correlation network of plasma amino acids between AF and Control

**A** Atrial Fibrillation

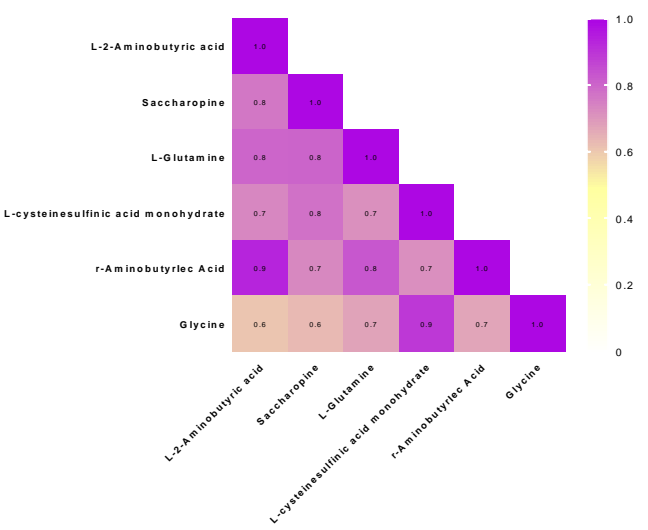

**B** Control

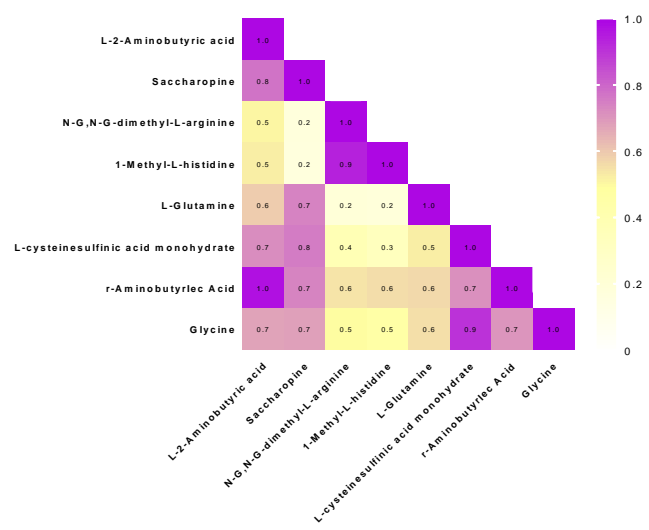

**C** Atrial Fibrillation

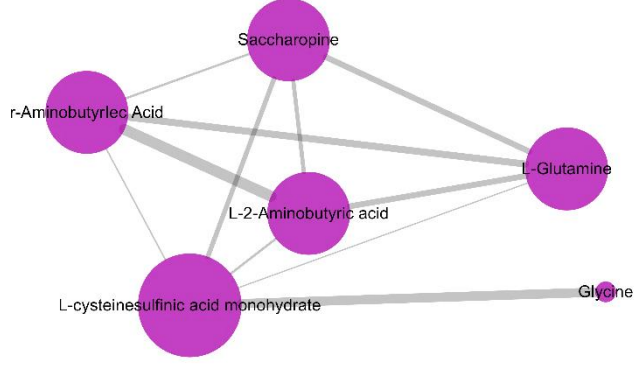

**D** Control

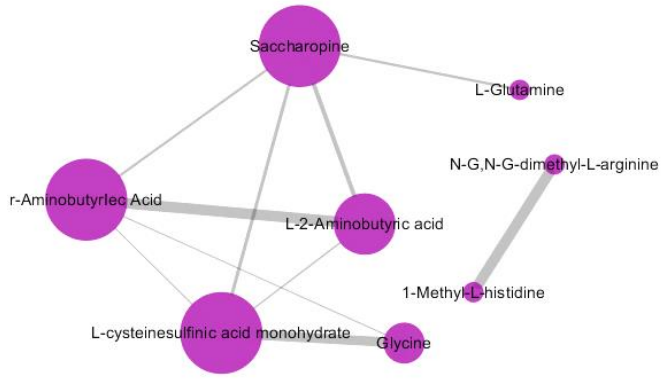

# Supplementary Table1 List of plasma amino acids being tested

| Number | Name                                | Molecular Formula | Molecular weight |
|--------|-------------------------------------|-------------------|------------------|
| 1      | L-Selenocystine                     | C6H12N2O4Se2      | 335.9122         |
| 2      | 5-Aminovaleric acid hydrochloride   | C5H11NO2          | 117.079          |
| 3      | h-Homoarginine                      | C7H16N4O2         | 188.1273         |
| 4      | L-3-Amino-isobutyric acid           | C4H9NO2           | 103.0633         |
| 5      | 3,5-Diiodo-L-tyrosine               | C9H9I2NO3         | 432.8672         |
| 6      | D-alloThreonine                     | C4H9NO3           | 119.0582         |
| 7      | Seleno-L-methionine                 | C5H11NO2Se        | 196.995          |
| 8      | L-2-Aminobutyric acid               | C4H9NO2           | 103.0633         |
| 9      | DL-Homocysteine                     | C4H9NO2S          | 135.0354         |
| 10     | DL-Methionine sulfoxide             | C5H11NO3S         | 165.046          |
| 11     | Saccharopine                        | C11H20N2O6        | 276.1321         |
| 12     | 3-Hydroxyanthranilic acid           | C7H7NO3           | 153.0426         |
| 13     | Iodotyrosine                        | C9H10INO3         | 306.9706         |
| 14     | L-leucyl-L-proline                  | C11H20N2O3        | 228.1474         |
| 15     | DL-3,4-dihydroxyphenylalanine       | C9H11NO4          | 197.0688         |
| 16     | Glycyl-L-leucine                    | C8H16N2O3         | 188.1161         |
| 17     | $\alpha$ -Phenylglycine             | C8H9NO2           | 151.0633         |
| 18     | L-Homoserine                        | C4H9NO3           | 119.0582         |
| 19     | O-Acetyl-L-serine                   | C5H9NO4           | 147.0532         |
| 20     | Iminodiacetic acid                  | C4H7NO4           | 133.0375         |
| 21     | N-G,N-G-dimethyl-L-arginine         | C8H18N4O2         | 202.143          |
| 22     | 1-Methyl-L-histidine                | C7H11N3O2         | 169.0851         |
| 23     | L-Glutamine                         | C5H10N2O3         | 146.0691         |
| 24     | L-Kynurenine                        | C10H12N2O3        | 208.0848         |
| 25     | gamma-Glu-epsilon-lys               | C11H21N3O5        | 275.1481         |
| 26     | 5-Hydroxy-L-tryptophan              | C11H12N2O3        | 220.0848         |
| 27     | L-cysteinesulfinic acid monohydrate | C3H7NO4S          | 153.0096         |
| 28     | Carnosine                           | C9H14N4O3         | 226.1066         |
| 29     | L-Asparagine                        | C4H8N2O3          | 132.0535         |
| 30     | 4-Hydroxy pyrrolidine-2-carboxylic  | C5H9NO3           | 131.0582         |
| 31     | N-epsilon-Acetyl-L-lysine           | C8H16N2O3         | 188.1161         |
| 32     | Pipecolic acid                      | C6H11NO2          | 129.079          |
| 33     | 4-Aminobenzoic acid                 | C7H7NO2           | 137.0477         |
| 34     | L-Cysteine-S-sulfate                | C3H7NO5S2         | 200.9766         |
| 35     | L-Lysine                            | C6H14N2O2         | 146.1055         |
| 36     | L-Valine                            | C5H11NO2          | 117.079          |
| 37     | L-Threonine                         | C4H9NO3           | 119.0582         |
| 38     | L-Aspartic acid                     | C4H7NO4           | 133.0375         |
| 39     | L-Methionine                        | C5H11NO2S         | 149.0511         |
| 40     | L-Proline                           | C5H9NO2           | 115.0633         |
| 41     | r-Aminobutyric Acid                 | C4H9NO2           | 103.0633         |
| 42     | L-Isoleucine                        | C6H13NO2          | 131.0946         |
| 43     | L-Tyrosine                          | C9H11NO3          | 181.0739         |
| 44     | L-Histidine                         | C6H9N3O2          | 155.0695         |
| 45     | Taurine                             | C2H7NO3S          | 125.0147         |
| 46     | L-Arginine                          | C6H14N4O2         | 174.1117         |
| 47     | L-Glutamic acid                     | C5H9NO4           | 147.0532         |
| 48     | Glycine                             | C2H5NO2           | 75.03203         |
| 49     | L-Homocystine                       | C8H16N2O4S2       | 268.0552         |
| 50     | L-Phenylalanine                     | C9H11NO2          | 165.079          |
| 51     | Sarcosine                           | C3H7NO2           | 89.04768         |
| 52     | L-Tryptophan                        | C11H12N2O2        | 204.0899         |
| 53     | L-Citrulline                        | C6H13N3O3         | 175.0957         |
| 54     | L-Leucine                           | C6H13NO2          | 131.0946         |
| 55     | L-Alanine                           | C3H7NO2           | 89.04768         |
| 56     | L-Serine                            | C3H7NO3           | 105.0426         |
| 57     | $\beta$ -Alanine                    | C3H7NO2           | 89.04768         |
| 58     | L-Cystathionine                     | C7H14N2O4S        | 222.0674         |
| 59     | Hypotaurine                         | C2H7NO2S          | 109.0198         |
| 60     | L-Cysteine                          | C3H7NO2S          | 121.0198         |
| 61     | L-Norvaline                         | C5H11NO2          | 117.08           |

## Supplementary Table2 Enrichment Analysis of metabolite sets associated with pathways

| Metabolite Set                             | Total | Hits | Statistic | Expected | P value    | Holm P     | FDR        |
|--------------------------------------------|-------|------|-----------|----------|------------|------------|------------|
| Threonine and 2-Oxobutanoate Degradation   | 20    | 1    | 31.193    | 1.6949   | 3.5316E-06 | 0.00015186 | 0.00015186 |
| Carnitine Synthesis                        | 22    | 2    | 12.119    | 1.6949   | 0.00037787 | 0.01587    | 0.0079718  |
| Glycine and Serine Metabolism              | 59    | 7    | 7.5315    | 1.6949   | 0.00055617 | 0.022803   | 0.0079718  |
| Valine, Leucine and Isoleucine Degradation | 60    | 4    | 9.9358    | 1.6949   | 0.0011726  | 0.046905   | 0.012606   |
| Biotin Metabolism                          | 8     | 1    | 13.902    | 1.6949   | 0.003347   | 0.13053    | 0.028784   |
| Taurine and Hypotaurine Metabolism         | 12    | 2    | 9.1238    | 1.6949   | 0.006621   | 0.2516     | 0.04745    |
| Bile Acid Biosynthesis                     | 65    | 1    | 10.337    | 1.6949   | 0.012249   | 0.45321    | 0.065838   |
| Porphyrin Metabolism                       | 40    | 1    | 10.337    | 1.6949   | 0.012249   | 0.45321    | 0.065838   |
| Lysine Degradation                         | 30    | 3    | 5.6139    | 1.6949   | 0.022918   | 0.80212    | 0.1095     |
| Methionine Metabolism                      | 43    | 5    | 4.2539    | 1.6949   | 0.029322   | 0.99694    | 0.12608    |
| Alanine Metabolism                         | 17    | 2    | 5.2955    | 1.6949   | 0.041662   | 1          | 0.14929    |
| Glutathione Metabolism                     | 21    | 2    | 5.2955    | 1.6949   | 0.041662   | 1          | 0.14929    |

## Supplementary Table3 Enrichment Analysis of metabolite sets associated with disease

| Metabolite Set                                    | Total | Hits | Statistic | Expected | P value    | Holm P    | FDR        |
|---------------------------------------------------|-------|------|-----------|----------|------------|-----------|------------|
| EARLY MARKERS OF MYOCARDIAL INJURY                | 14    | 5    | 13.955    | 1.6949   | 1.5159E-05 | 0.0010612 | 0.00098217 |
| PYRIDOXAMINE 5-PRIME-PHOSPHATE OXIDASE DEFICIENCY | 3     | 2    | 20.765    | 1.6949   | 2.8062E-05 | 0.0019363 | 0.00098217 |
| HEART FAILURE                                     | 10    | 5    | 13.284    | 1.6949   | 4.6901E-05 |           | 0.0010944  |
| REFRACTORY LOCALIZATION-RELATED EPILEPSY          | 10    | 10   | 9.1562    | 1.6949   | 0.00010351 | 0.0069351 | 0.0018114  |
| PYRUVATE DEHYDROGENASE DEFICIENCY (E3)            | 7     | 3    | 13.163    | 1.6949   | 0.00024116 | 0.015916  | 0.0033762  |
| NEONATAL INTRAHEPATIC CHOLESTASIS                 | 12    | 5    | 8.1042    | 1.6949   | 0.0009638  | 0.062647  | 0.011244   |
| METABOLITES AFFECTED BY GENDER                    | 9     | 3    | 9.0053    | 1.6949   | 0.0014982  | 0.095885  | 0.014982   |

**Supplementary Figure1 Data normalization.**

**Supplementary Figure2 Heatmap of the overall amino acid.**

**Supplementary Figure3 Multivariate Exploratory ROC Analysis.**

**Supplementary Figure4 Correlation network of amino acids between AF and Control.** A. Heatmap of the strongly correlated amino acids in AF patients. B. Heatmap of the strongly correlated amino acids in control patients. The figures within each crossover represented the correlation efficiency between the respective amino acids. Purple color indicated enhanced co-expression and yellow color indicated decreased co-expression. Correlation threshold was set as 0.7. C. and D. The respective correlation network for AF and control patients.

**Supplementary Table1 List of plasma amino acids being tested.**

**Supplementary Table2 Enrichment Analysis of metabolite sets associated with pathways.**

**Supplementary Table3 Enrichment Analysis of metabolite sets associated with disease.**
